# Supplementary material for: Influence of Grain-Growth Inhibitors on Modified (Ba,Sr)(Sn,Ti)O3 for Electrocaloric Application
Source: MDPI journal article supplement (doi:10.3390/ma17051036), 2024-02-23
Supplement: s1 [file s1]

SUPPLEMENTARY

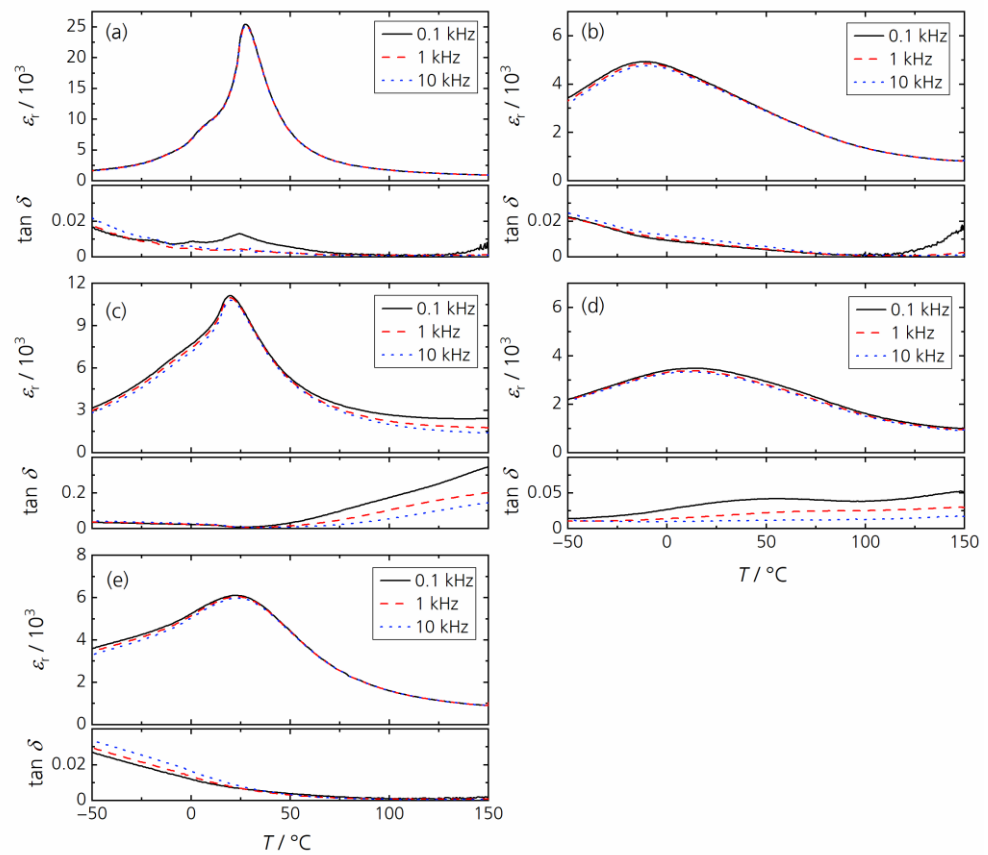

**Figure S1.** Temperature dependence of relative permittivity  $\epsilon_r$  and dielectric loss factor  $\tan \delta$  measured at different frequencies for (a) BSSnT, (b) BSSnT+Mg, (c) BSSnT+Y, (d) BSSnT+Mn, and (e) BCSSnT-20.

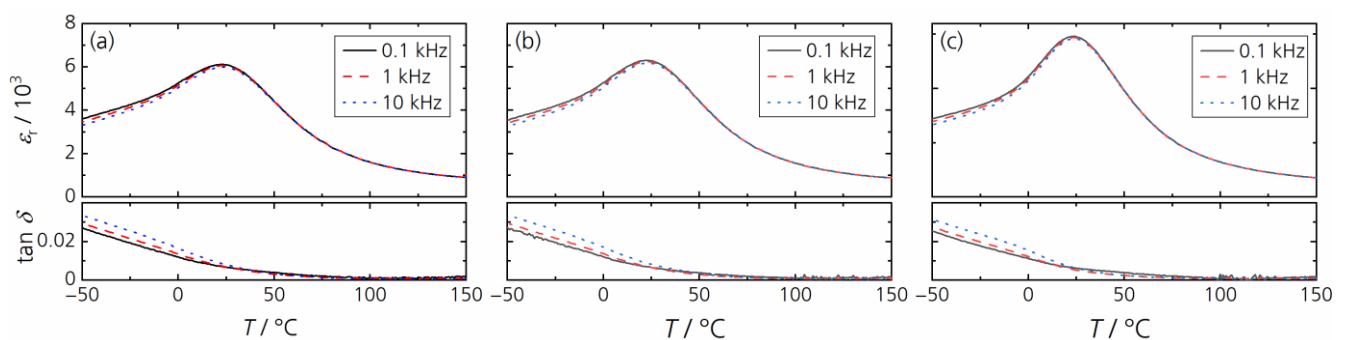

**Figure S2.** Temperature dependence of relative permittivity  $\epsilon_r$  and dielectric loss factor  $\tan \delta$  measured at different frequencies for BCSSnT-20 sintered at 1350  $^\circ\text{C}$  for (a) 1 h, (b) 2 h and (c) 4 h.

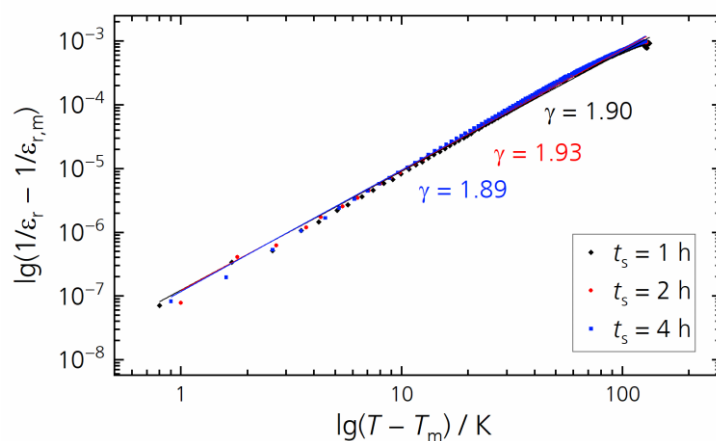

**Figure S3.** Plots of  $\log(1/\varepsilon_r - 1/\varepsilon_{r,m})$  versus  $\log(T - T_m)$  and fitted curves at 1 kHz for BCSSnT-20 sintered at 1350 °C for 1 h (black), 2 h (red) and 4 h (blue).

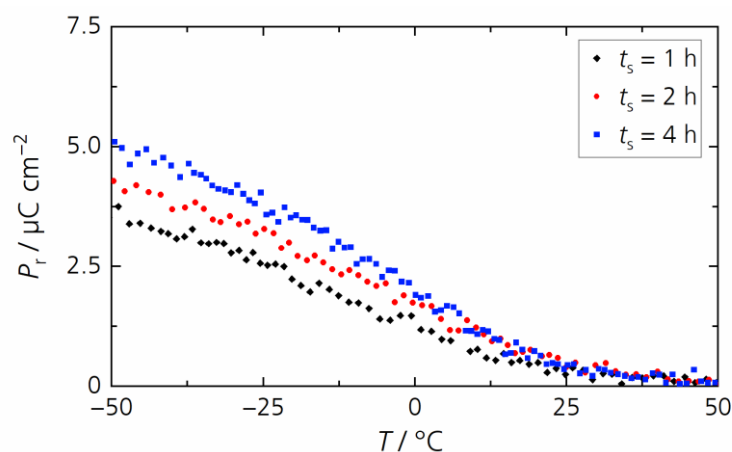

**Figure S4.** Temperature-dependent measurement of remanent polarization  $P_r$  for BCSSnT-20 sintered at 1350 °C for 1 h (black), 2 h (red) and 4 h (black) measured at 2 V  $\mu\text{m}^{-1}$  and 10 Hz.

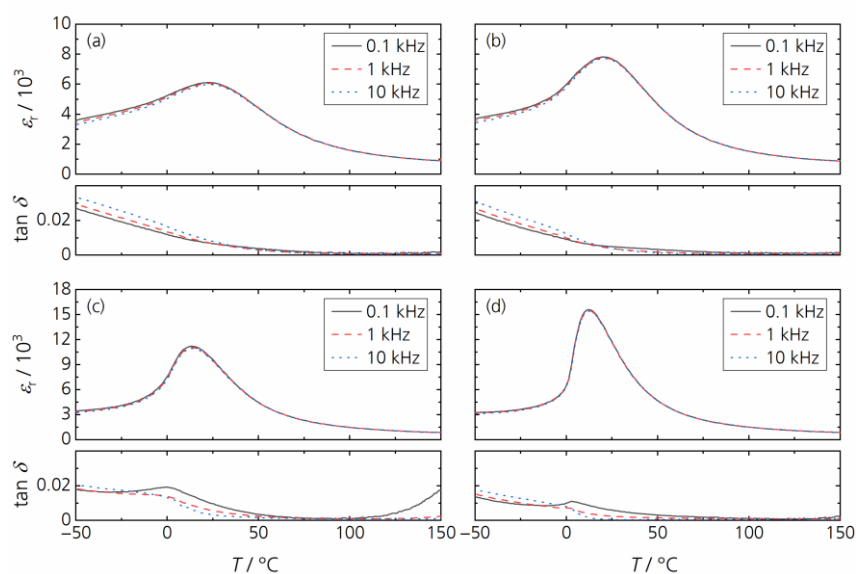

**Figure S5.** Temperature dependence of relative permittivity  $\varepsilon_r$  and dielectric loss factor  $\tan \delta$  measured at different frequencies for BCSSnT-20 for 1 h at (a) 1350 °C, (b) 1375 °C, (c) 1400 °C and (d) 1425 °C.

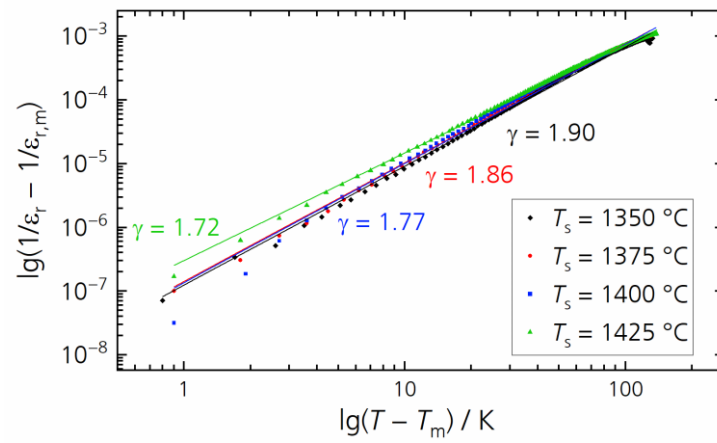

**Figure S6.** Plots of  $\log(1/\epsilon_r - 1/\epsilon_{r,m})$  versus  $\log(T - T_m)$  and fitted curves at 1 kHz for BCSSnT-20 sintered for 1 h at 1350 °C (black), 1375 °C (red), 1400 °C (blue) and 1425 °C (green).

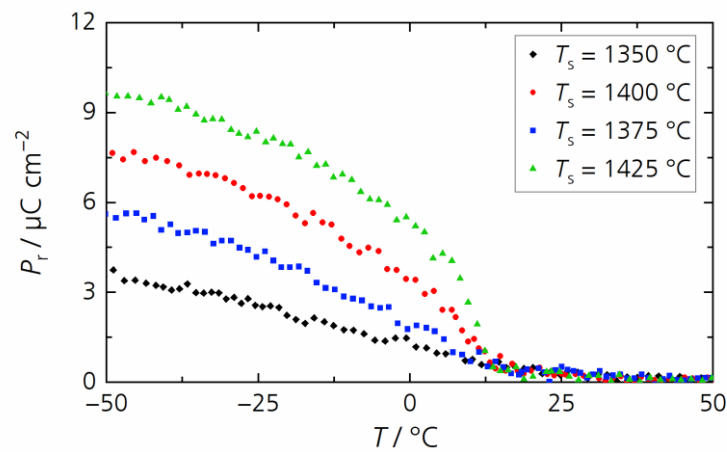

**Figure S7.** Temperature-dependent measurement of remanent polarization  $P_r$  for BCSSnT-20 sintered for 1 h at 1350 °C (black), 1375 °C (red), 1400 °C (blue) and 1425 °C (green) measured at  $2 \text{ V } \mu\text{m}^{-1}$  and 10 Hz.
